# Supplementary material for: Mononuclear copper(ii) complexes with polypyridyl ligands: synthesis, characterization, DNA interactions/cleavages and in vitro cytotoxicity towards human cancer cells
Source: Royal Society of Chemistry journal article supplement (doi:10.1039/d4dt00984c), 2024-01-01
Supplement: d4dt00984c1.pdf [file d4dt00984c1.pdf]

## Supplementary Information

### **Mononuclear Copper(II) Complexes with Polypyridyl Ligands: Synthesis, Characterization, DNA Interactions/Cleavages and *in vitro* Cytotoxicity towards Human Cancer Cells**

Arabinda Muley<sup>a,†</sup>, Sadananda Kumbhakar<sup>a,†</sup>, Rajnikant Raut<sup>b</sup>, Shobhit Mathur<sup>a</sup>, Indrajit Roy<sup>a</sup>,  
Taruna Saini<sup>b</sup>, Ashish Misra<sup>b\*</sup>, Somnath Maji<sup>a\*</sup>

<sup>a</sup>*Department of Chemistry, Indian Institute of Technology, Hyderabad, Kandi, Sangareddy  
502284*

*Telangana, India*

<sup>b</sup>*Department of Biotechnology, Indian Institute of Technology, Hyderabad, Kandi,  
Sangareddy 502284*

*Telangana, India*

[ashishmisra@bt.iith.ac.in](mailto:ashishmisra@bt.iith.ac.in)

† These authors contributed equally

Email address: [smaji@chy.iith.ac.in](mailto:smaji@chy.iith.ac.in) (Somnath Maji)

\*Corresponding author

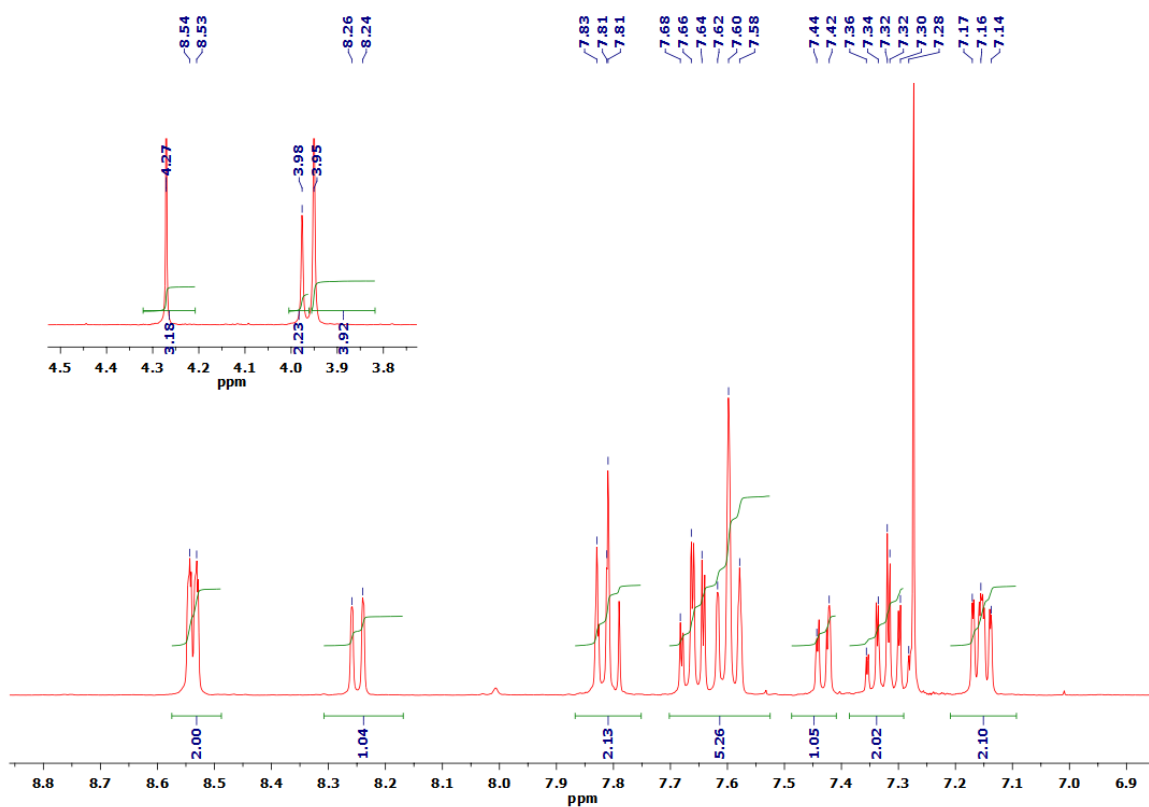

Fig. S1  $^1\text{H}$  NMR spectra of  $\text{L}^2$  in  $\text{CDCl}_3$ .

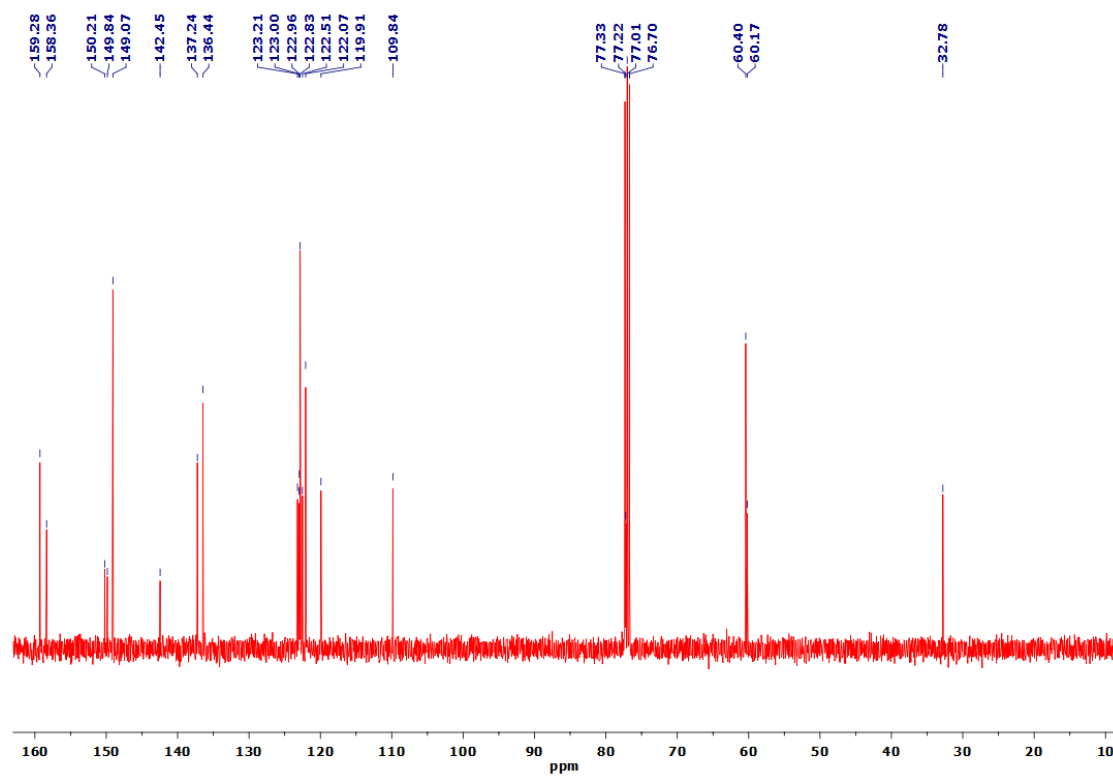

Fig. S2  $^{13}\text{C}$  NMR spectra of  $\text{L}^2$  in  $\text{CDCl}_3$ .

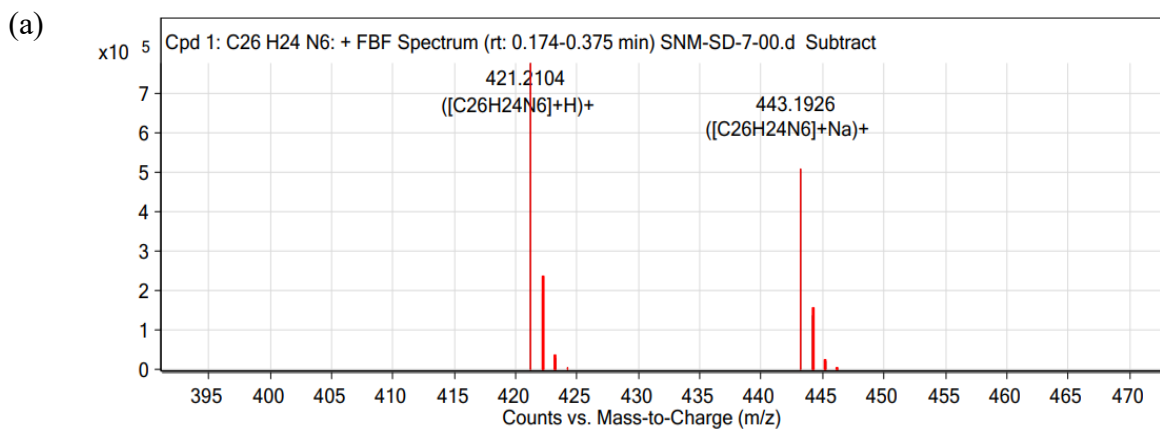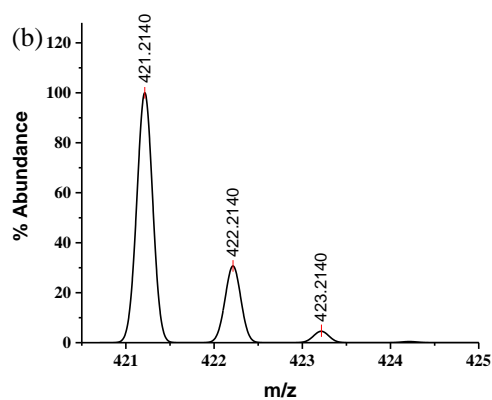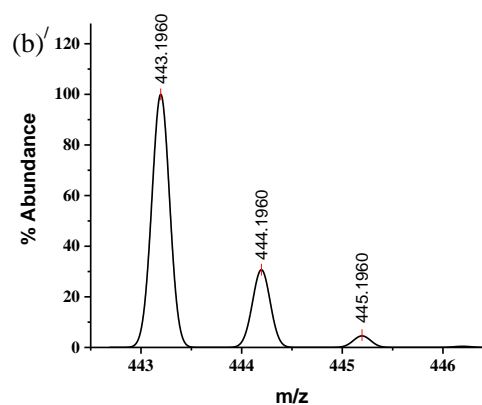

**Fig. S3 (a)** ESI-MS spectra, **(b)** and **(b)'** are simulated mass spectra of **L<sup>2</sup>**.

Compound Spectra (Zoomed)

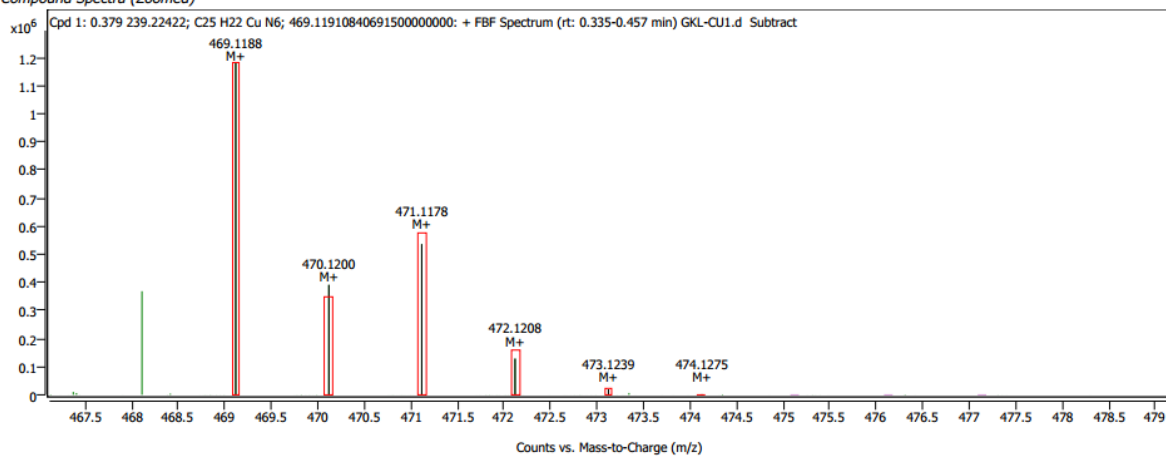

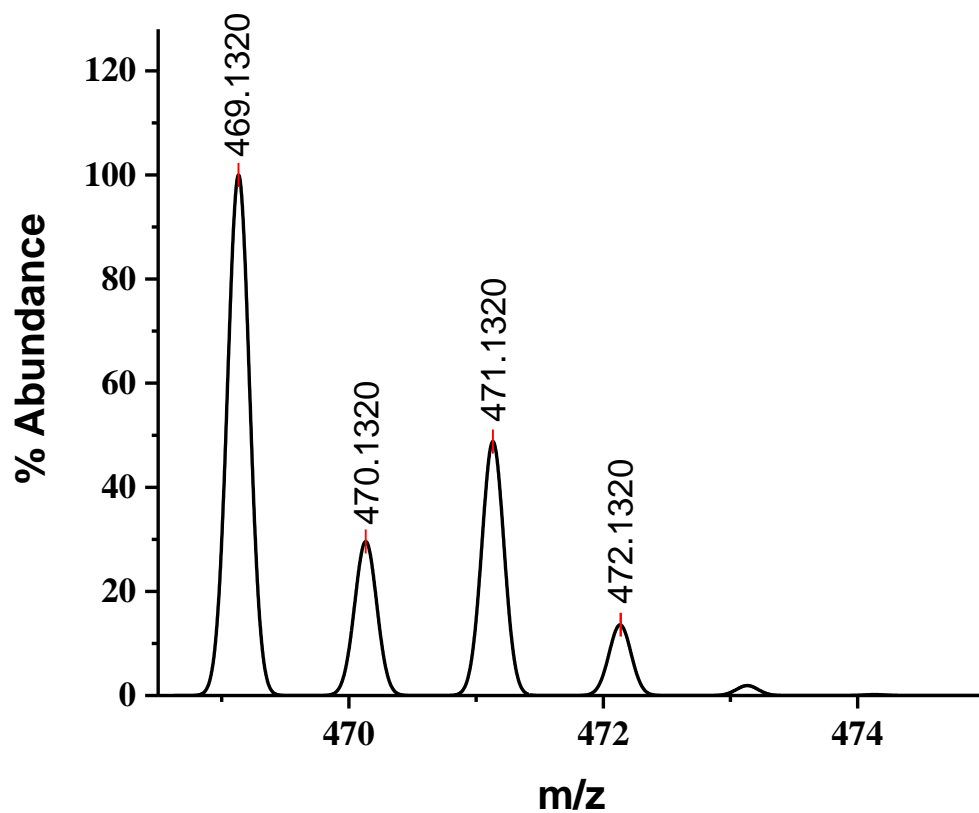

Fig. S4 ESI-MS spectra of  $[1](ClO_4)_2$ .

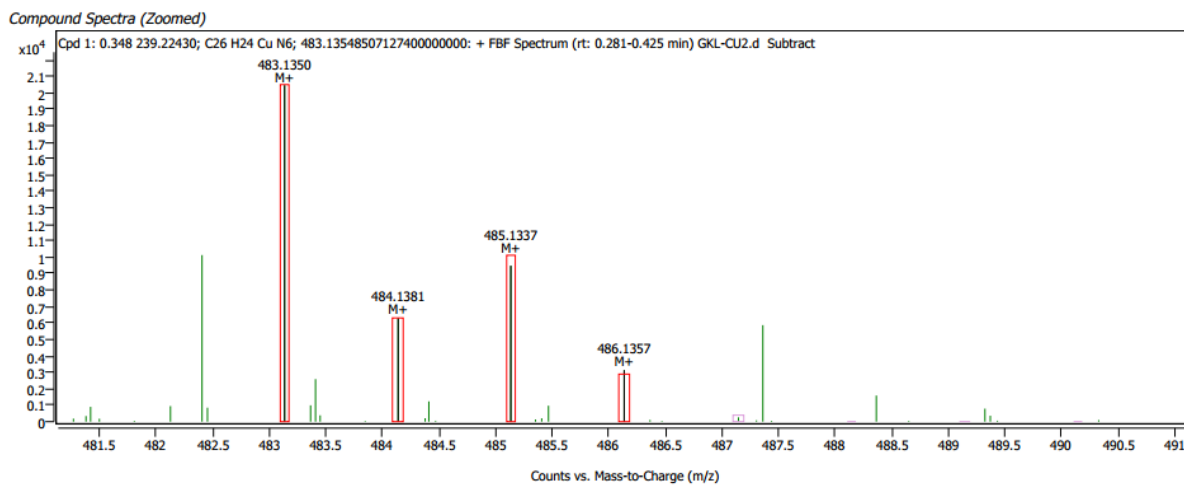

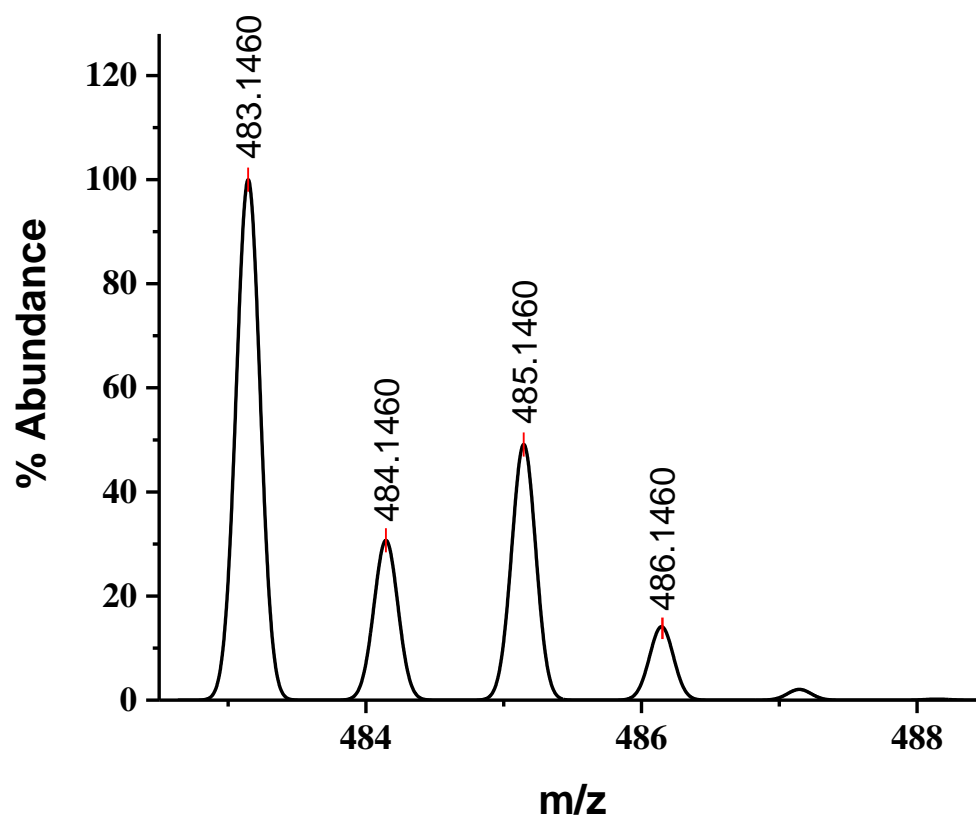

Fig. S5 ESI-MS spectra of [2](ClO<sub>4</sub>)<sub>2</sub>.

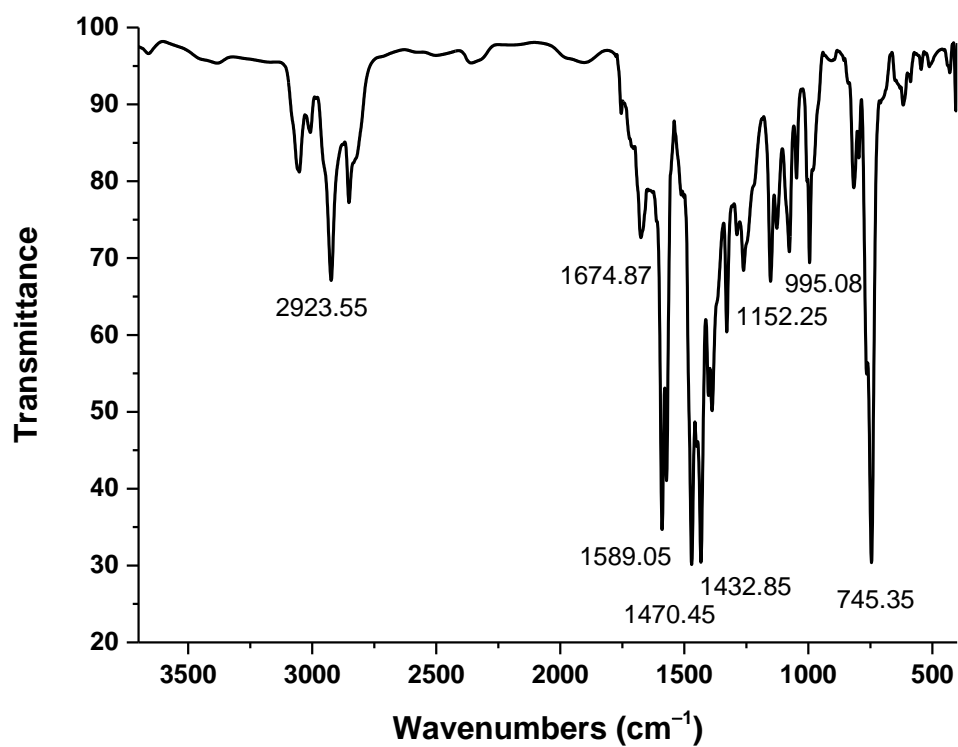

Fig. S6 FT-IR (solid) spectra of  $L^2$ .

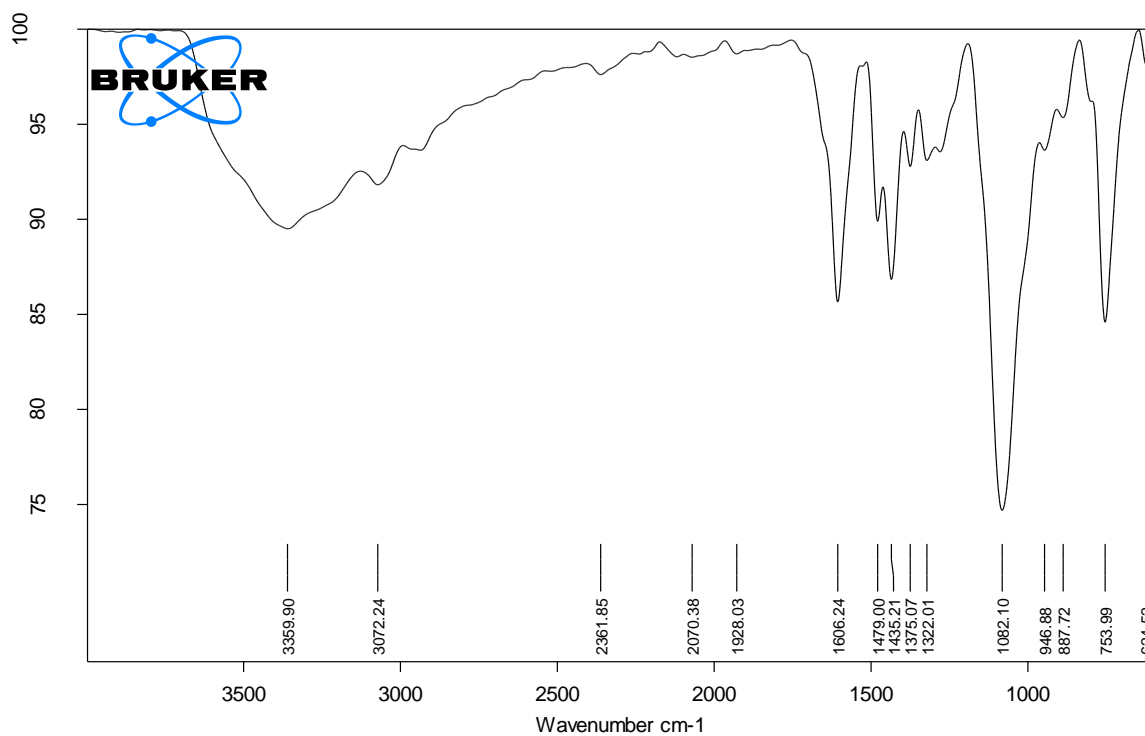

Fig. S7 FT-IR (solid) spectra of  $[1](ClO_4)_2$ .

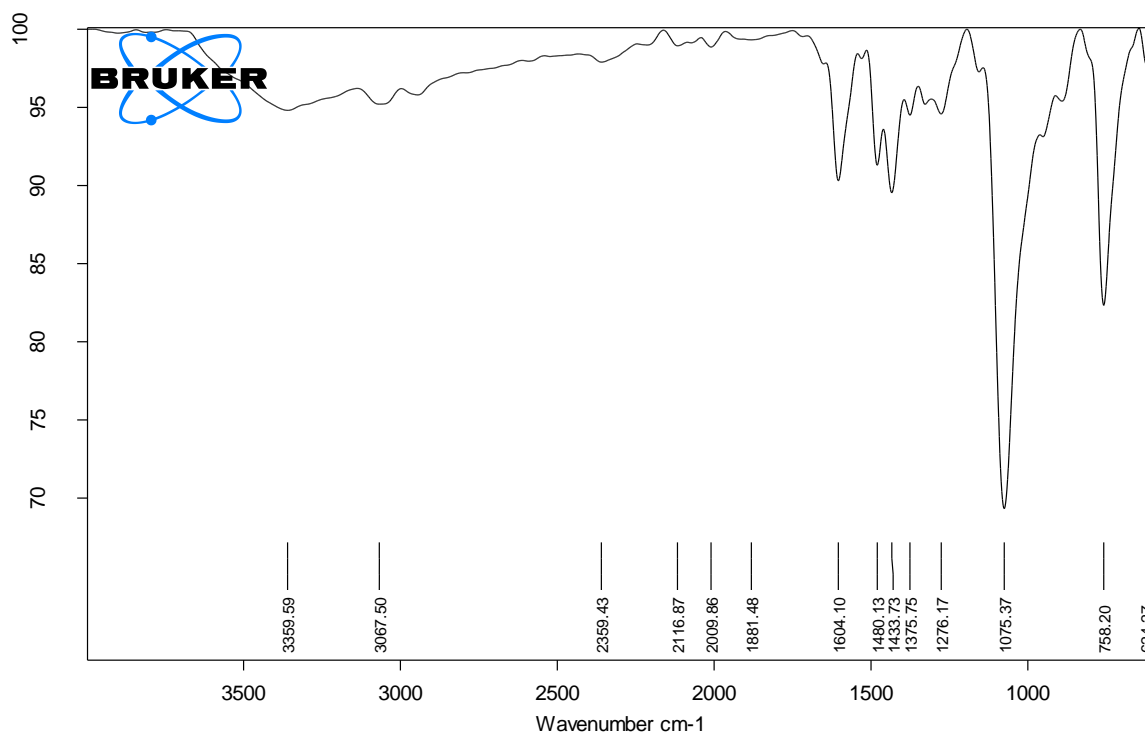

Fig. S8 FT-IR (solid) spectra of [2](ClO<sub>4</sub>)<sub>2</sub>.

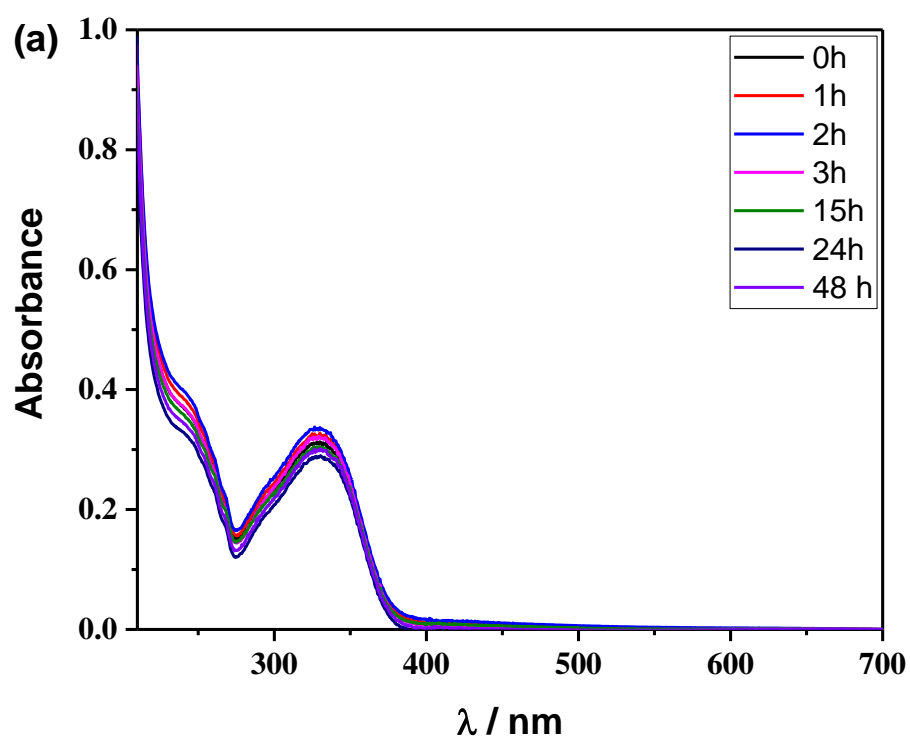

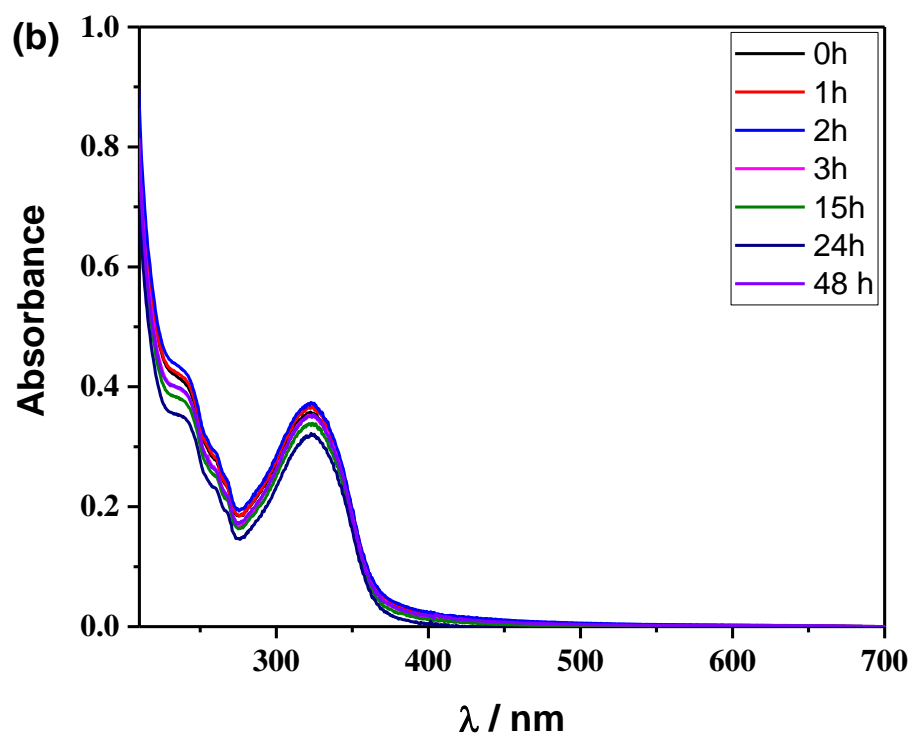

**Fig. S9** Stability of (a)  $[1](\text{ClO}_4)_2$  and (b)  $[2](\text{ClO}_4)_2$  verified in Tris-HCl buffer solution (pH 7.2) for two days.



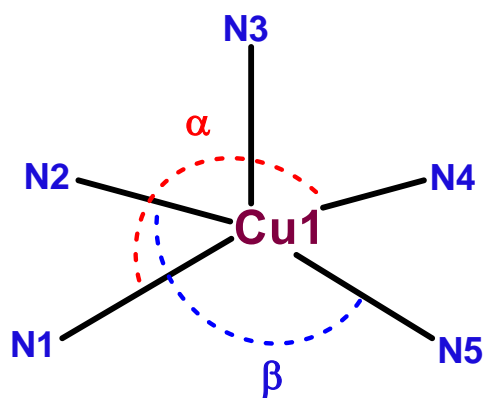

$$\beta = 161.54(19), \alpha = 126.30(19)$$

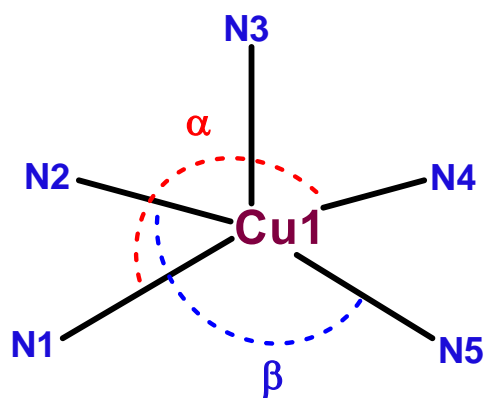

$$\beta = 160.58(14), \alpha = 130.25(13)$$

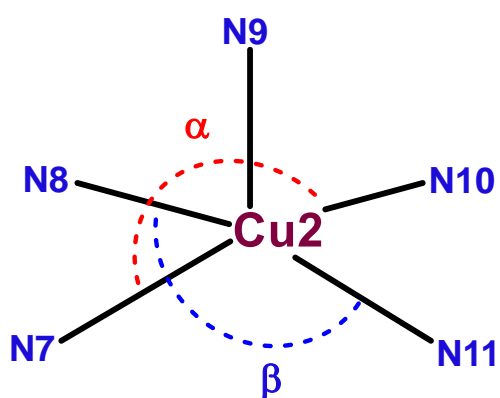

$$\beta = 161.3(2), \alpha = 126.83(19)$$

$\tau_5$  values:

For  $[1](\text{ClO}_4)_2$   
0.58 (Cu1 and Cu2)

For  $[2](\text{ClO}_4)_2$   
0.51

**Fig. S10** Schematic representation of  $[1](\text{ClO}_4)_2$  and  $[2](\text{ClO}_4)_2$  and respective  $\tau_5$  values calculation.

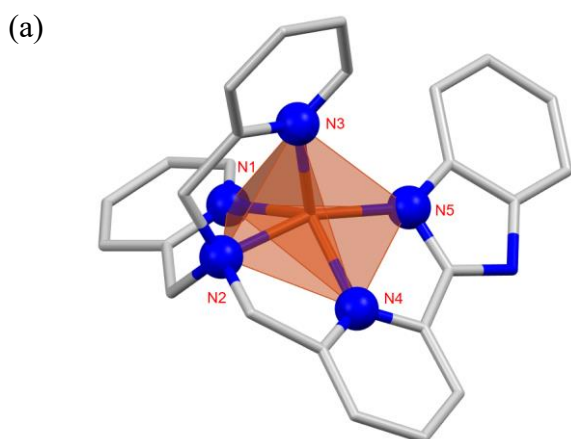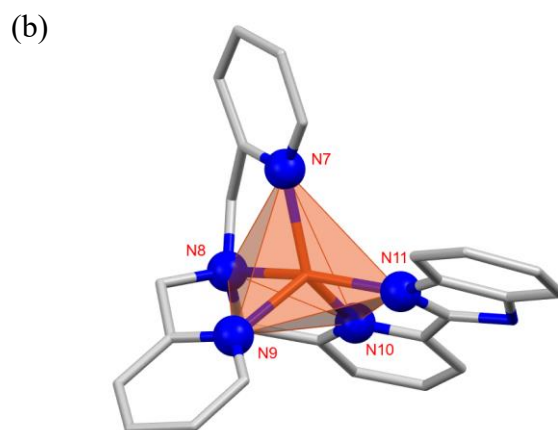

(c)

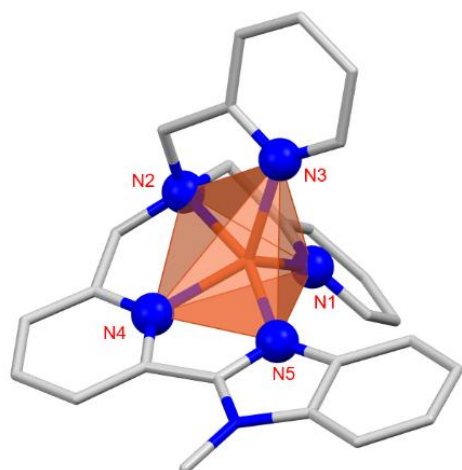

**Fig. S11** The polyhedron view of (a) Cu1 center of [1](ClO4)<sub>2</sub> (b) Cu2 center of [1](ClO4)<sub>2</sub> and (c) Cu1 center of [2](ClO4)<sub>2</sub>.

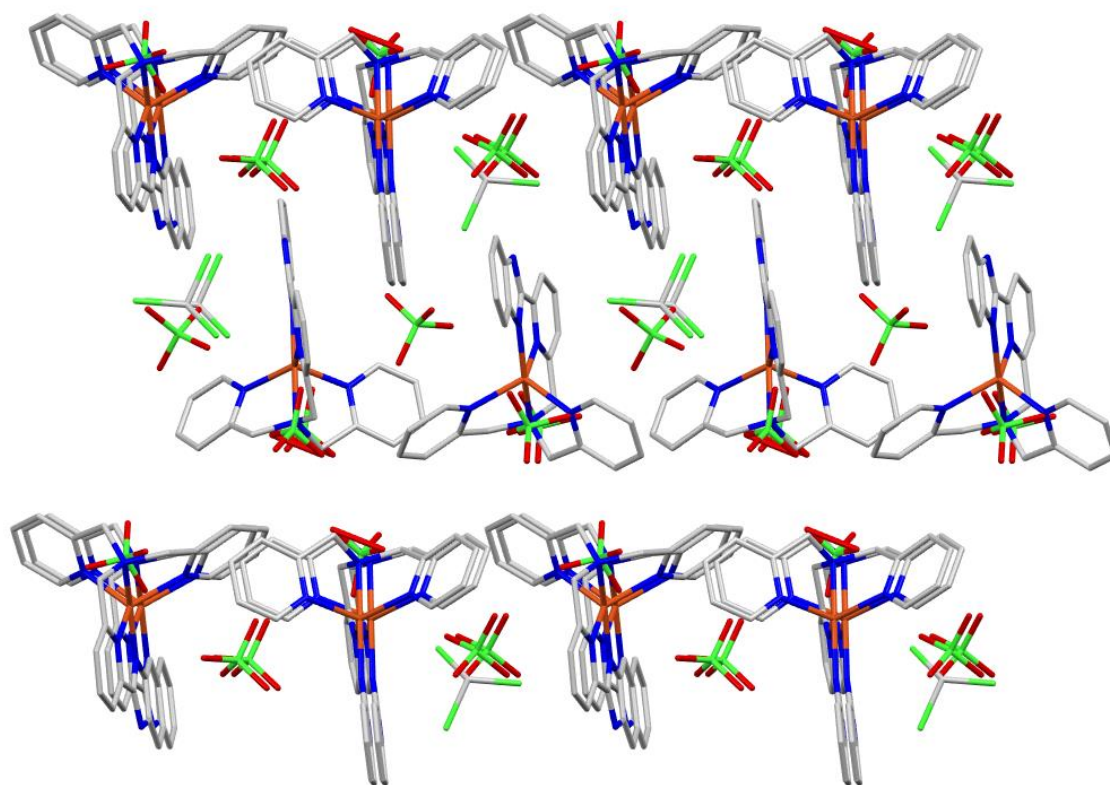

**Fig. S12** Crystal packing of [1](ClO4)<sub>2</sub> viewed along *b*-axis.

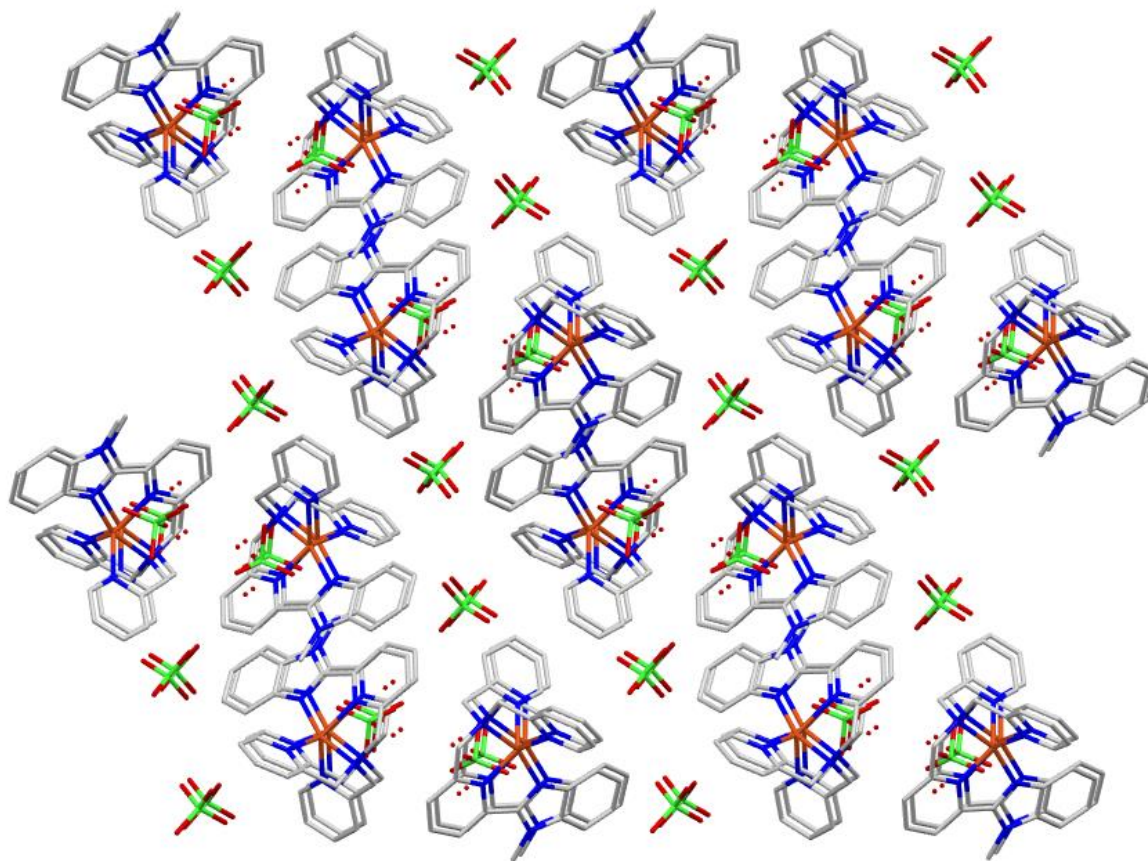

**Fig. S13** Crystal packing of [2](ClO<sub>4</sub>)<sub>2</sub> viewed along *b*-axis.

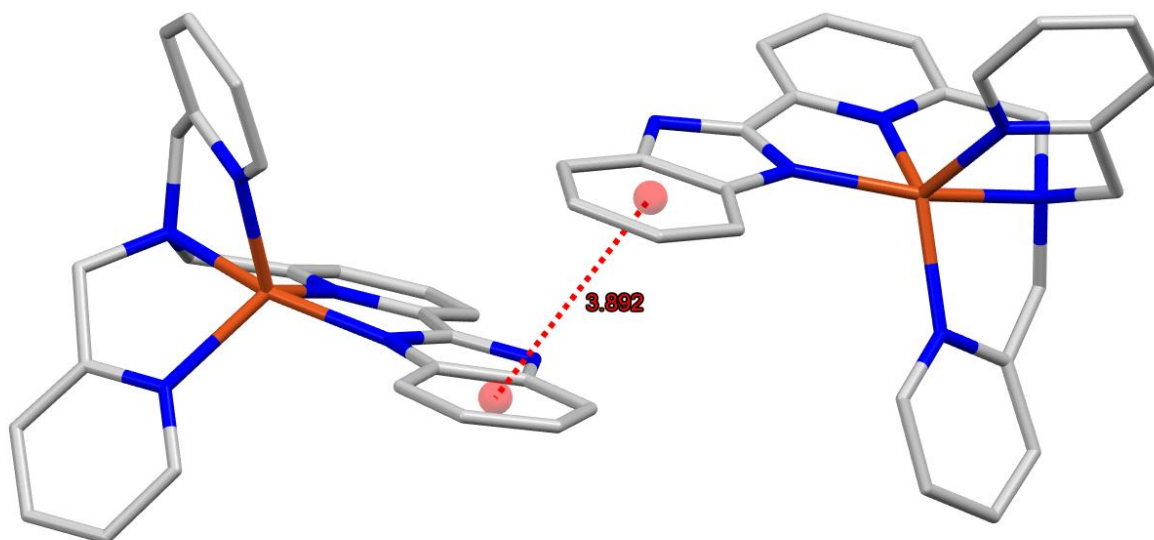

**Fig. S14**  $\pi$ - $\pi$  stacking present in the crystal structures of [1](ClO<sub>4</sub>)<sub>2</sub>.

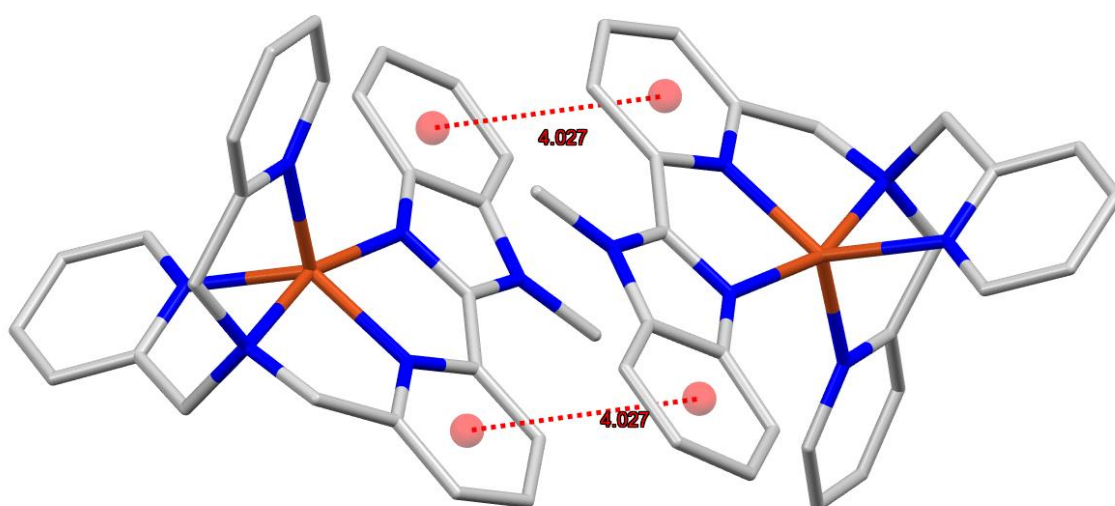

**Fig. S15**  $\pi$ - $\pi$  stacking present in the crystal structures of  $[2](ClO_4)_2$ .

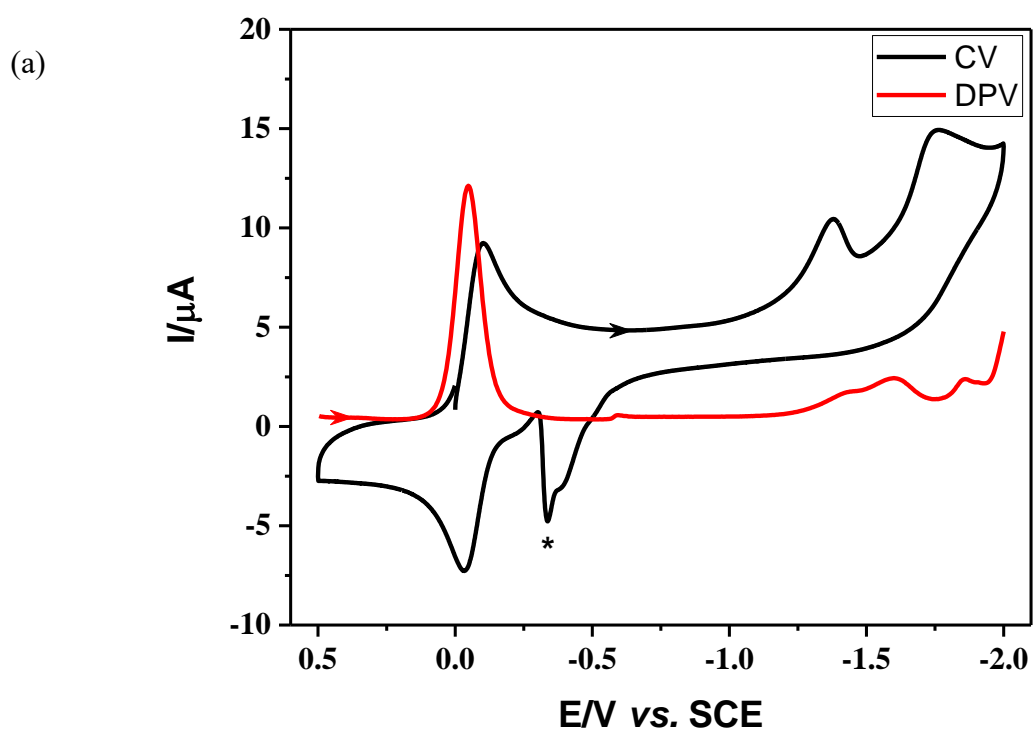

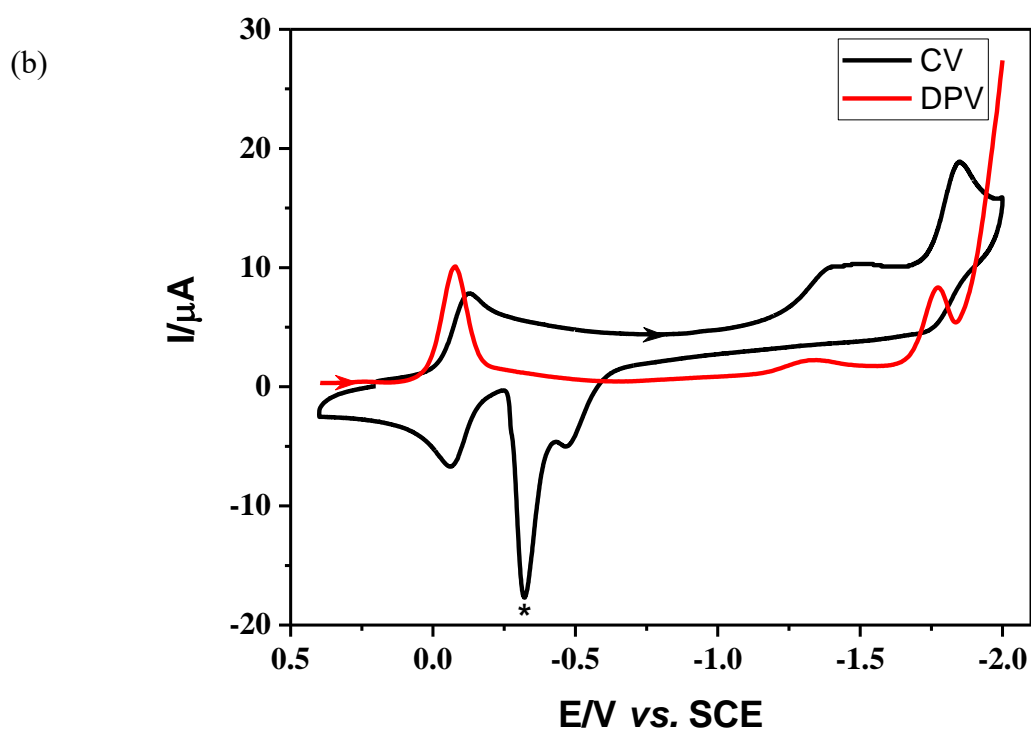

**Fig. S16** CV and DPV of (a)  $[1](ClO_4)_2$  and (b)  $[2](ClO_4)_2$  in acetonitrile using 0.1 M TBAP as supporting electrolyte under argon atmosphere. The peak indicated by \* is the deposited copper, for  $Cu^0 \rightarrow Cu^I$  oxidation.

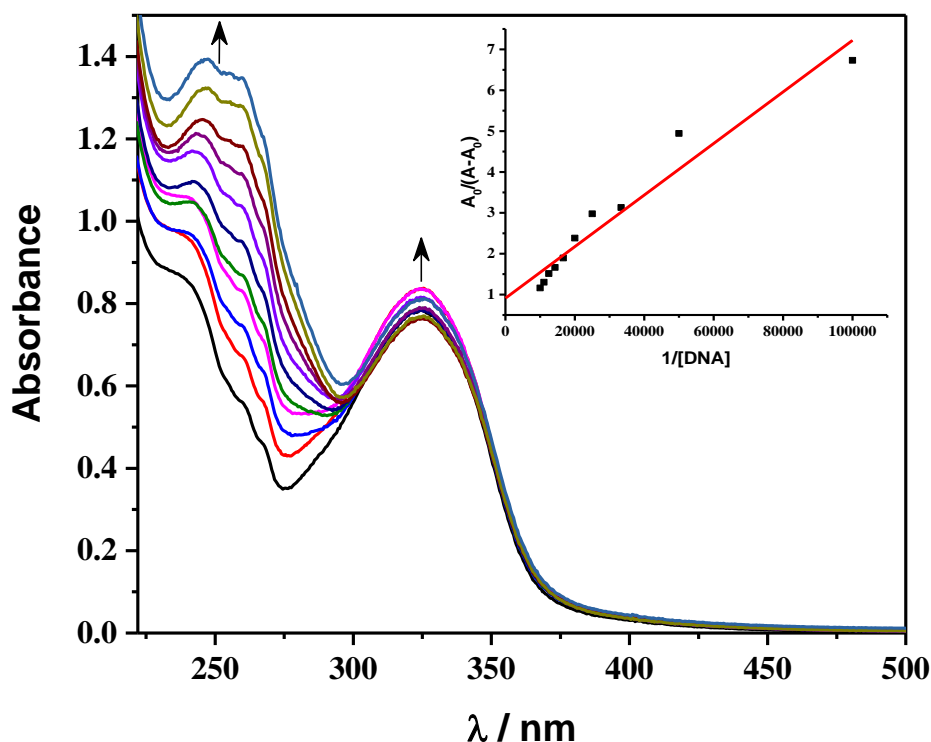

**Fig. S17** Absorption spectra of  $[2](\text{ClO}_4)_2$  ( $50 \mu\text{M}$ ) in the absence (black) and presence (color) of ss-DNA ( $10, 20, 30, 40, 50, 60, 70, 80, 90$  and  $100 \mu\text{M}$ , respectively) in  $5 \text{ mM}$  Tris-HCl buffer ( $\text{pH} = 7.2$ ). The arrow shows the absorbance changes on increasing DNA concentration. Inset: the plot of  $A_0/(A-A_0)$  versus  $1/[\text{DNA}]$  for the calculation of binding constant of complex  $[2](\text{ClO}_4)_2$ .

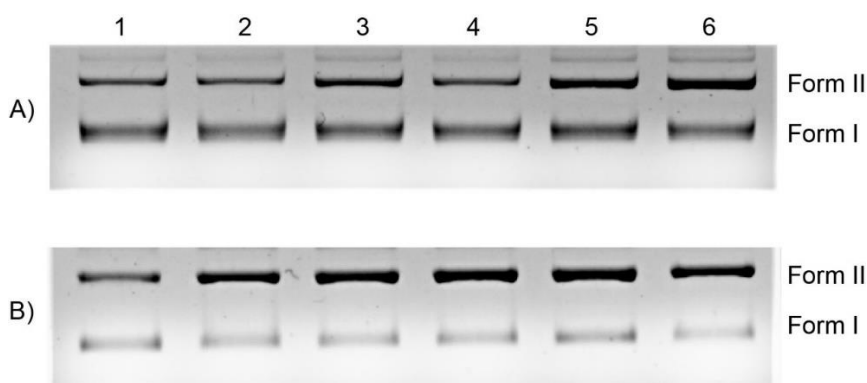

**Fig. S18** Agarose gel showing the cleavage of plasmid DNA ( $\text{pDNA } 200 \text{ ng}/\mu\text{L}$ ) at different concentrations upon incubation at  $37 \text{ }^\circ\text{C}$  for  $3 \text{ h}$  in  $50 \text{ mM}$  Tris-HCl buffer ( $\text{pH } 7.2$ ). Lane 1: Control; Lane 2-6 pDNA + complex  $[1](\text{ClO}_4)_2$  &  $[2](\text{ClO}_4)_2$  (A-B). The following concentrations range was used for each complex. Complex  $[1](\text{ClO}_4)_2$ :  $1 \mu\text{M}, 5 \mu\text{M}, 25 \mu\text{M}, 50 \mu\text{M}, 100 \mu\text{M}$ . Complex  $[2](\text{ClO}_4)_2$ :  $5 \mu\text{M}, 10 \mu\text{M}, 25 \mu\text{M}, 50 \mu\text{M}, 100 \mu\text{M}$ .

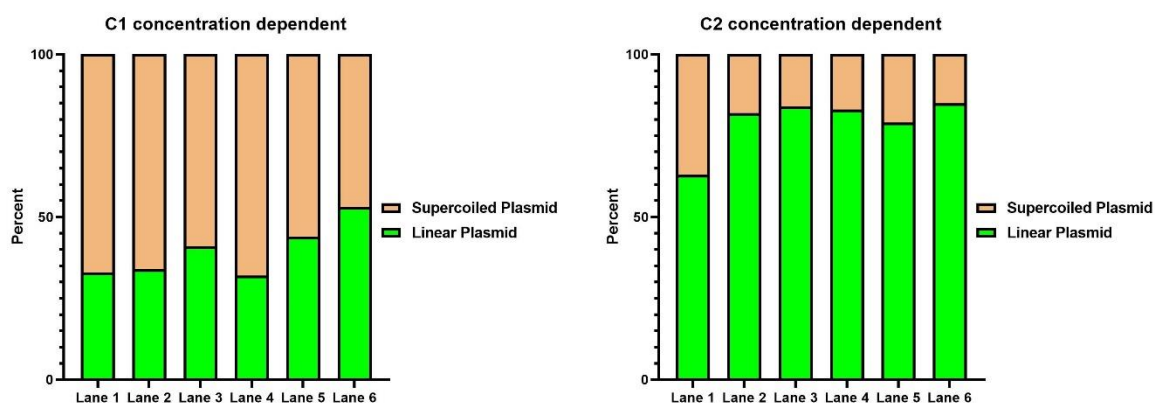

**Fig. S19** Histograms representing the coverage of supercoiled and linear DNA in concentration-dependent cleavage assay.

**Table S1** Concentration-dependent cleavage assay

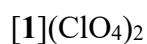

| Sr.No. | Concentrations | Form I (%) | Form II (%) |
|--------|----------------|------------|-------------|
| 1      | Control        | 67         | 33          |
| 2      | 1 μM           | 66         | 34          |
| 3      | 5 μM           | 59         | 41          |
| 4      | 25 μM          | 68         | 32          |
| 5      | 50 μM          | 56         | 44          |
| 6      | 100 μM         | 47         | 53          |

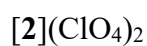

| Sr.No. | Concentrations | Form I (%) | Form II (%) |
|--------|----------------|------------|-------------|
| 1      | Control        | 37         | 63          |
| 2      | 5 μM           | 18         | 82          |
| 3      | 10 μM          | 16         | 84          |
| 4      | 25 μM          | 17         | 83          |
| 5      | 50 μM          | 21         | 79          |
| 6      | 100 μM         | 15         | 85          |

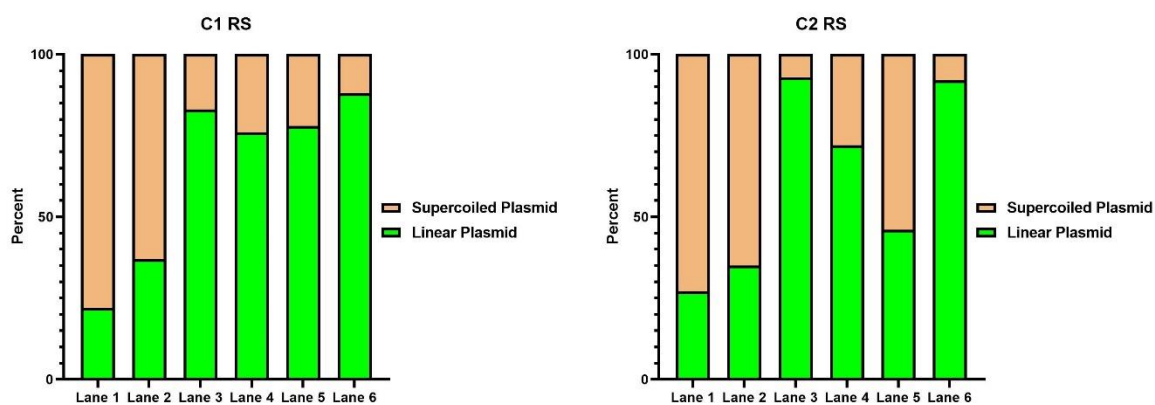

**Fig. S20** Histograms representing the coverage of supercoiled and linear DNA in radical scavenging assay.

**Table S2** Radical Scavenging assay values

[1](ClO<sub>4</sub>)<sub>2</sub>

| Lanes  | Form II% | Form I% |
|--------|----------|---------|
| Lane 1 | 22       | 78      |
| Lane 2 | 37       | 63      |
| Lane 3 | 83       | 17      |
| Lane 4 | 76       | 24      |
| Lane 5 | 78       | 22      |
| Lane 6 | 88       | 12      |

[2](ClO<sub>4</sub>)<sub>2</sub>

| Lanes  | Form II% | Form I% |
|--------|----------|---------|
| Lane 1 | 27       | 73      |
| Lane 2 | 35       | 65      |
| Lane 3 | 93       | 7       |
| Lane 4 | 72       | 28      |
| Lane 5 | 46       | 54      |
| Lane 6 | 92       | 8       |
